# Supplementary material for: Personalized Prognostication of Kidney Transplant Candidates on the Waiting List: A Machine Learning Approach
Source: Research Square preprint supplement (doi:10.21203/rs.3.rs-108492/v1), 2020-11-19
Supplement: Supplementary file 1 [file 4f5fa99f604645d817ff2c3e.xlsx]

## Sheet: Supplementary Table 2
Category	Subclass	Mean Predicted CIF (%)	Observed CIF (%)	∆
cPRA bracket	<0.8	23.9449	23.6971	0.247776
	0.8-0.89	28.1458	32.864	-4.7182
	0.9-0.97	28.3917	33.7681	-5.37639
	0.98	26.9102	25.7435	1.16677
	0.99	28.3961	34.0864	-5.69021
	1	26.0769	28.0804	-2.00349
Region	1	23.9111	20.9202	2.99096
	2	23.5287	22.3261	1.2026
	3	22.7457	22.8843	-0.138592
	4	25.0051	25.4856	-0.480489
	5	22.0786	20.6346	1.44402
	6	25.3442	28.6019	-3.25763
	7	26.5107	27.0061	-0.495428
	8	27.5309	31.654	-4.12302
	9	25.408	26.7636	-1.35564
	10	25.6526	26.9959	-1.34327
	11	24.48	24.6171	-0.137018
Listing year	2015	24.4489	23.8154	0.633426
	2016	24.2605	24.4293	-0.168785
Race	Asian	19.2832	16.8548	2.42841
	Black	20.5868	20.0513	0.53551
	Multi	24.4347	26.3325	-1.89779
	Native	22.5227	23.9245	-1.40173
	Pacific	20.1918	19.6793	0.512475
	White	26.6387	27.3283	-0.689556
