# Supplementary material for: Personalized Prognostication of Kidney Transplant Candidates on the Waiting List: A Machine Learning Approach
Source: Research Square preprint supplement (doi:10.21203/rs.3.rs-108492/v1), 2020-11-19
Supplement: Supplementary file 2 [file ce4a35bdbcae25a6faefab9c.xlsx]

## Sheet: Supplementary Table 1
	Development	Validation
n	27451	29778
Accept an hepatitis B core antibody positive donor, n(%)	16850 (61.4)	17312 (58.1)
Maximum acceptable warm ischemia time, mean(SD)	69.59 (40.55)	70.82 (39.32)
Maximum acceptable cold ischemia time, mean(SD)	34.45 (12.01)	34.86 (12.91)
Maximum acceptable percent glomerular sclerosis with greater than 10 glomeruli observed, mean(SD)	28.25 (17.15)	27.76 (15.77)
Minimum acceptable donor serum creainine - final, mean(SD)	16.38 (99.28)	16.81 (100.16)
Maximum acceptable number of HLA mismatches for A, B & DR loci, mean(SD)	5.97 (0.41)	5.97 (0.42)
Accept an HCV positive donor, n(%)	2136 ( 7.8)	3006 (10.1)
Education, n(%)
None	149 ( 0.5)	158 ( 0.5)
Grade school	1586 ( 5.8)	1678 ( 5.6)
High school	10676 (38.9)	11219 (37.7)
Attended college/technical school	7406 (27.0)	7822 (26.3)
Associate/Bachelor degree	5364 (19.5)	6213 (20.9)
Post-college graduate degree	2270 ( 8.3)	2688 ( 9.0)
Working for income, n(%)	9629 (35.1)	10590 (35.6)
Symptomatic Peripheral Vascular Disease, n(%)	1910 ( 7.0)	2501 ( 8.4)
Total albumin, mean(SD)	3.90 (0.60)	3.91 (0.58)
Malignancy, n(%)	2232 ( 8.1)	2638 ( 8.9)
Minimum acceptable donor age, mean(SD)	20.06 (25.17)	20.26 (25.35)
Number of frequnet HLA-A alleles, n(%)
0	1284 ( 4.7)	1369 ( 4.6)
1	9493 (34.6)	10223 (34.3)
2	16674 (60.7)	18186 (61.1)
Number of frequnet HLA-B alleles, n(%)
0	1971 ( 7.2)	2088 ( 7.0)
1	10172 (37.1)	10870 (36.5)
2	15308 (55.8)	16820 (56.5)
Number of frequnet HLA-DR alleles, n(%)
0	2823 (10.3)	3037 (10.2)
1	12796 (46.6)	13921 (46.7)
2	11832 (43.1)	12820 (43.1)
US citizen, n(%)	25305 (92.2)	27405 (92.0)
Primary payment method, n(%)
Priate insurance	12110 (44.1)	13041 (43.8)
Pblic insurance - Medicaid	2461 ( 9.0)	2549 ( 8.6)
Public insurance - Medicare FFS	9102 (33.2)	9268 (31.1)
Public insurance - Medicare & Choice	3189 (11.6)	4107 (13.8)
Other	589 ( 2.1)	813 ( 2.7)
Primary diagnosis, n(%)
Diabetes	9096 (33.1)	10193 (34.2)
FSG	1568 ( 5.7)	1726 ( 5.8)
Hypertension	5910 (21.5)	6120 (20.6)
IGA	732 ( 2.7)	833 ( 2.8)
PK	6839 (24.9)	7161 (24.0)
SLE	2103 ( 7.7)	2286 ( 7.7)
Other	1203 ( 4.4)	1459 ( 4.9)
Diabetes type, n(%)
None	15718 (57.3)	16969 (57.0)
Type I	1061 ( 3.9)	1127 ( 3.8)
Type II	10539 (38.4)	11524 (38.7)
Type other	133 ( 0.5)	158 ( 0.5)
Inactive initial WL status, n(%)	7152 (26.1)	6964 (23.4)
Functional status, n(%)
0.1	29 ( 0.1)	22 ( 0.1)
0.2	181 ( 0.7)	200 ( 0.7)
0.3	118 ( 0.4)	154 ( 0.5)
0.4	579 ( 2.1)	704 ( 2.4)
0.5	827 ( 3.0)	1029 ( 3.5)
0.6	1814 ( 6.6)	2449 ( 8.2)
0.7	6447 (23.5)	7188 (24.1)
0.8	8183 (29.8)	8484 (28.5)
0.9	6928 (25.2)	7371 (24.8)
1	2345 ( 8.5)	2177 ( 7.3)
